# Supplementary material for: Guía práctica para participar en una subasta
Source: MDPI journal article supplement (doi:10.3390/polym14010043), 1998-01-01
Supplement: s1 [file s1]

## Supporting Information

### Reconstruction of fibroin nanofibers (FNFs) via electrospinning: fabrication of poly(vinyl alcohol) / FNFs composite nanofibers from aqueous solution

Shohei FUJITA<sup>1</sup>, Huaizhong XU<sup>\*1</sup>, Yubing Dong<sup>2</sup>, Yoko OKAHISA<sup>\*1</sup>

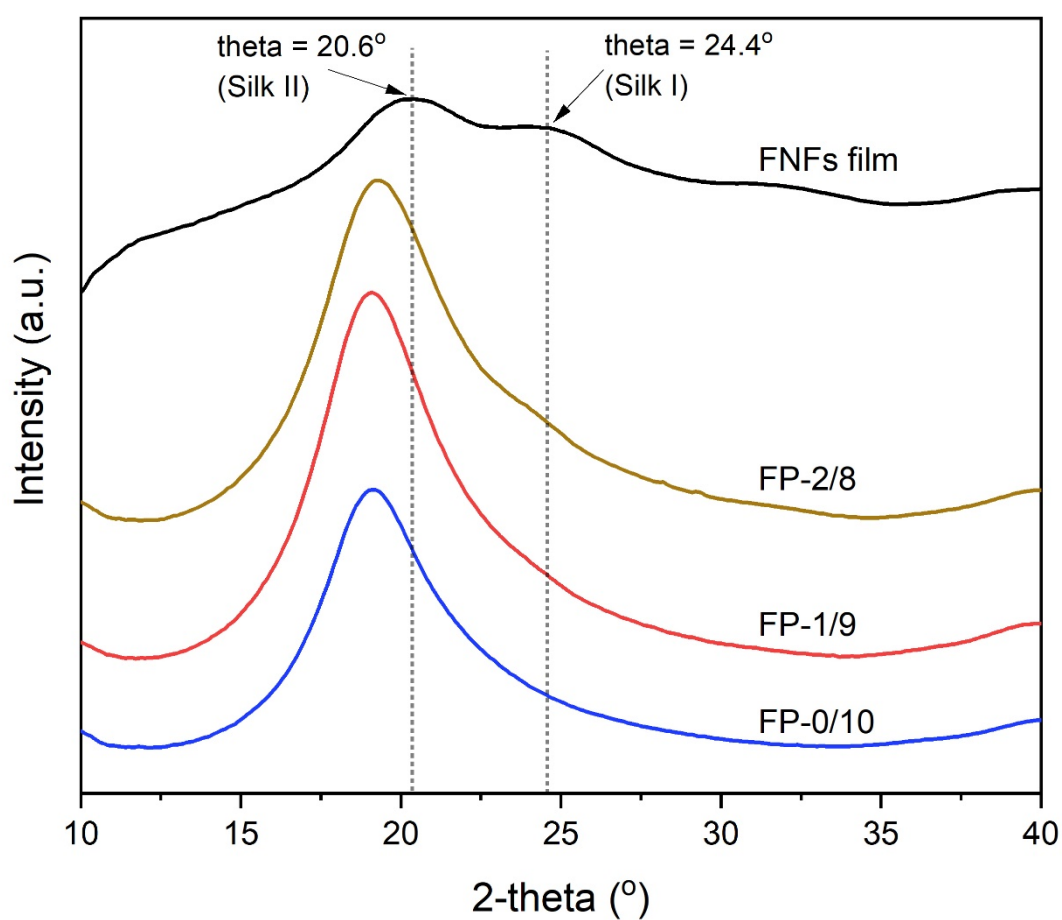

**Figure S1.** WAXD of FNFs film, PVA and FNFs/PVA nanofibers.

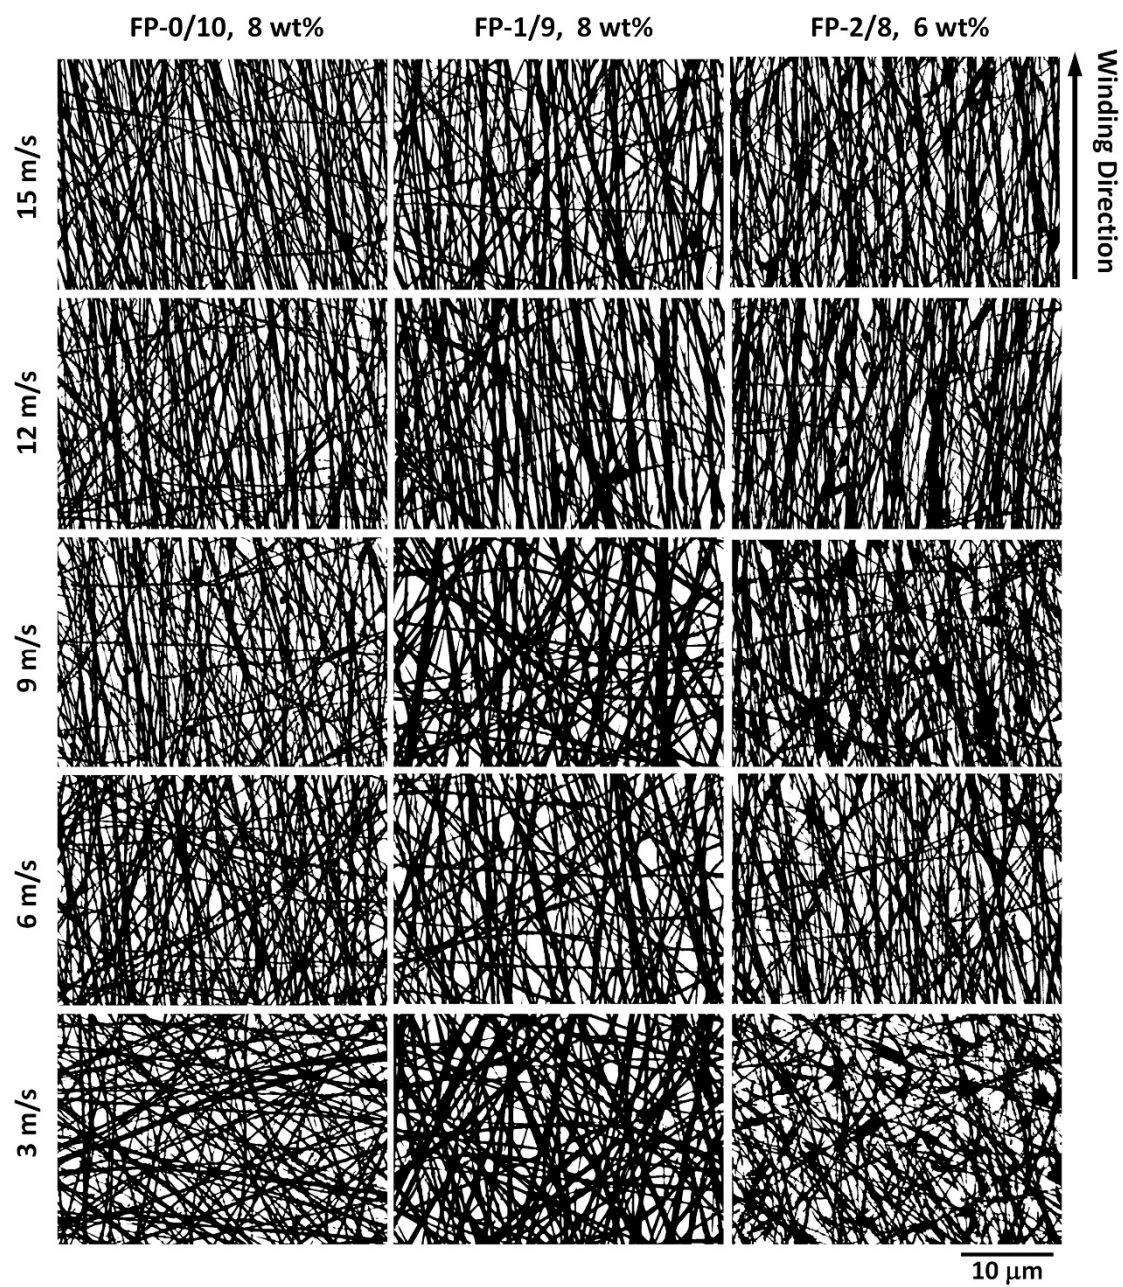

**Figure S2.** The binary images of figure 2.

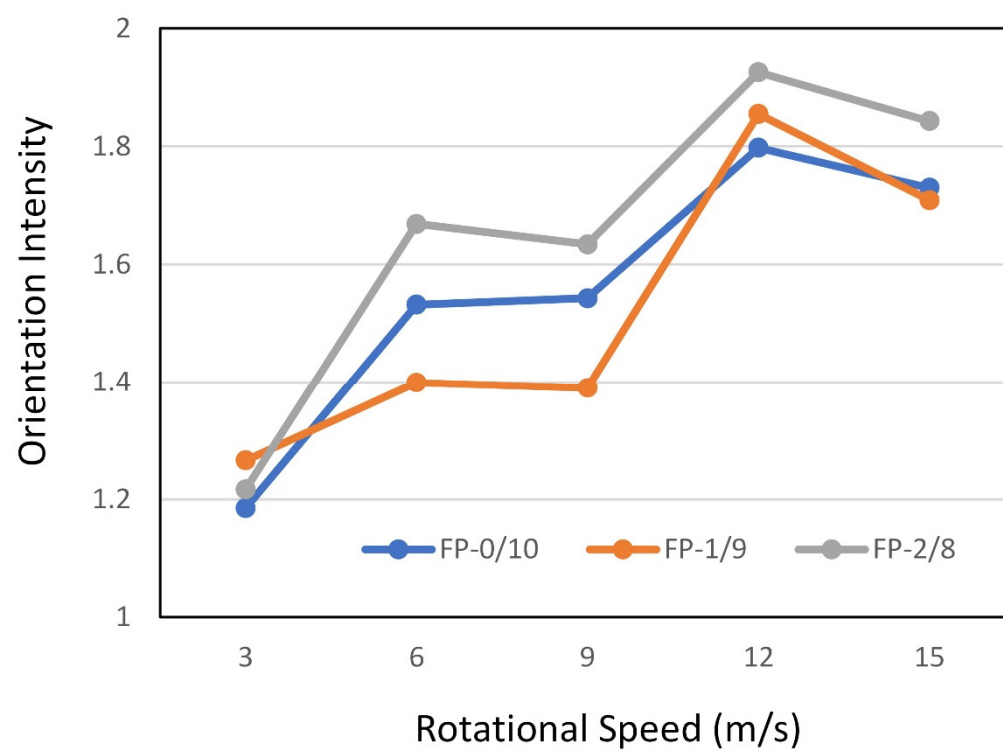

**Figure S3.** Plot of fiber orientation intensity versus rotational speed.
